# Supplementary material for: An Overview of the Archaeological, Radiocarbonic and Palaeoclimatic Record at the Iberian Peninsula During the Middle to Upper Paleolithic Transition
Source: Research Square preprint supplement (doi:10.21203/rs.3.rs-3579964/v2), 2024-01-31
Supplement: Supplementary file 1 [file 12f478034b339b21dd4346bb.docx]

**SupplementaryMaterial**

**1.List of Radiocarbon Dates related to the MUPT**

**2. List of dated sites related to the MUPT used to perform the Spatial Analysis through time-slice maps**

**3. R code for the Summed Probabilistic Distributions using the rcarbon Package**

| **Site** | **Age** | **SD** | **Homo** | **Lithic Industry** |
| --- | --- | --- | --- | --- |
| Abric Romani | 37200 | 900 | NEA | Aurignacian |
| Abric Romani | 37290 | 990 | NEA | Aurignacian |
| Abric Romani | 37900 | 1000 | NEA | Aurignacian |
| Abric Romani | 37900 | 1000 | NEA | Aurignacian |
| Abric Romani | 20680 | 110 | AMH | Aurignacian |
| Abric Romani | 23160 | 490 | AMH | Aurignacian |
| Abric Romani | 25010 | 120 | AMH | Aurignacian |
| Abric Romani | 28440 | 650 | AMH | Aurignacian |
| Abric Romani | 35000 | 500 | AMH | Aurignacian |
| Abric Romani | 35400 | 800 | AMH | Aurignacian |
| Abric Romani | 35400 | 810 | AMH | Aurignacian |
| Abric Romani | 35900 | 600 | AMH | Aurignacian |
| Abric Romani | 36090 | 230 | AMH | Aurignacian |
| Abric Romani | 36300 | 1300 | AMH | Aurignacian |
| Abric Romani | 36590 | 640 | AMH | Aurignacian |
| Abric Romani | 36740 | 920 | AMH | Aurignacian |
| Abric Romani | 39060 | 350 | NEA | Mousterian |
| Abric Romani | 40680 | 940 | NEA | Mousterian |
| Abric Romani | 43200 | 1100 | NEA | Mousterian |
| Abric Romani | 43500 | 1200 | NEA | Mousterian |
| Abric Romani | 44100 | 400 | NEA | Mousterian |
| Abric Romani | 44500 | 1200 | NEA | Mousterian |
| Abric Romani | 47100 | 2100 | NEA | Mousterian |
| Abric Romani | 40680 | 940 | NEA | Mousterian |
| Abric Romani | 43200 | 1100 | NEA | Mousterian |
| Abric Romani | 43500 | 1200 | NEA | Mousterian |
| Abric Romani | 44100 | 5900 | NEA | Mousterian |
| Abric Romani | 44500 | 1200 | NEA | Mousterian |
| Abric Romani | 44900 | 2500 | NEA | Mousterian |
| Abric Romani | 45100 | 3100 | NEA | Mousterian |
| Abric Romani | 46300 | 2400 | NEA | Mousterian |
| Abric Romani | 46500 | 1500 | NEA | Mousterian |
| Abric Romani | 46900 | 2600 | NEA | Mousterian |
| Abric Romani | 47100 | 2100 | NEA | Mousterian |
| Abric Romani | 47400 | 2500 | NEA | Mousterian |
| Abric Romani | 48000 | 1600 | NEA | Mousterian |
| Abric Romani | 48600 | 2300 | NEA | Mousterian |
| Abric Romani | 49200 | 2900 | NEA | Mousterian |
| Abric Romani | 49200 | 3300 | NEA | Mousterian |
| Abric Romani | 49300 | 1600 | NEA | Mousterian |
| Abric Romani | 49300 | 2700 | NEA | Mousterian |
| Abric Romani | 50400 | 2600 | NEA | Mousterian |
| Aitzbitarte III | 28010 | 600 | AMH | Aurignacian |
| Aitzbitarte III | 33608 | 116 | AMH | Aurignacian |
| Aitzbitarte III | 31130 | 390 | AMH | Aurignacian |
| Aitzbitarte III | 34900 | 600 | AMH | Aurignacian |
| Aitzbitarte III | 31950 | 450 | AMH | Aurignacian |
| Aitzbitarte III | 30990 | 390 | AMH | Aurignacian |
| Aitzbitarte III | 31210 | 860 | AMH | Aurignacian |
| Aitzbitarte III | 26350 | 475 | AMH | Aurignacian |
| Aitzbitarte III | 28320 | 605 | AMH | Aurignacian |
| Aitzbitarte III | 22420 | 365 | AMH | Aurignacian |
| Aitzbitarte III | 22580 | 295 | AMH | Aurignacian |
| Aitzbitarte III | 18400 | 215 | AMH | Aurignacian |
| Aitzbitarte III | 31600 | 400 | AMH | Aurignacian |
| Aitzbitarte III | 30990 | 390 | AMH | Aurignacian |
| Aitzbitarte III | 31130 | 390 | AMH | Aurignacian |
| Aitzbitarte III | 34900 | 600 | AMH | Aurignacian |
| Aitzbitarte III | 29020 | 320 | AMH | Gravettian |
| Aitzbitarte III | 29130 | 310 | AMH | Gravettian |
| Aitzbitarte III | 31090 | 400 | AMH | Gravettian |
| Aitzbitarte III | 31300 | 400 | AMH | Gravettian |
| Aitzbitarte III | 31600 | 400 | AMH | Gravettian |
| Aitzbitarte III | 31950 | 450 | AMH | Gravettian |
| Almoinha | 19940 | 180 | AMH | Solutrean |
| Almoinha | 20380 | 150 | AMH | Solutrean |
| Almonda | 35000 | 2000 | NEA | Mousterian |
| Almonda | 53000 | 300 | NEA | Mousterian |
| Almonda | 136000 | 8000 | NEA | Mousterian |
| Almonda, EVS | 35000 | 2000 | NEA | Mousterian |
| Almonda, Gruta da Oliveiraa | 25850 | 550 | NEA | Mousterian |
| Almonda, Gruta da Oliveiraa | 31682 | 227 | NEA | Mousterian |
| Almonda, Gruta da Oliveiraa | 32490 | 499 | NEA | Mousterian |
| Almonda, Gruta da Oliveiraa | 35929 | 348 | NEA | Mousterian |
| Almonda, Gruta da Oliveiraa | 37241 | 773 | NEA | Mousterian |
| Almonda, Gruta da Oliveiraa | 41960 | 330 | NEA | Mousterian |
| Almonda, Gruta da Oliveiraa | 42160 | 340 | NEA | Mousterian |
| Almonda, Gruta da Oliveiraa | 42877 | 606 | NEA | Mousterian |
| Almonda, Gruta da Oliveiraa | 44154 | 1074 | NEA | Mousterian |
| Almonda, Gruta da Oliveiraa | 44475 | 1100 | NEA | Mousterian |
| Almonda, Gruta da Oliveiraa | 46350 | 2050 | NEA | Mousterian |
| Almonda, Gruta da Oliveiraa | 46596 | 1638 | NEA | Mousterian |
| Almonda, Gruta da Oliveiraa | 53310 | 490 | NEA | Mousterian |
| Amalda | 28540 | 310 | AMH | Gravettian |
| Amalda | 28540 | 110 | AMH | Gravettian |
| Amalda | 27400 | 110 | AMH | Gravettian |
| Amalda | 27400 | 100 | AMH | Gravettian |
| Amalda | 19000 | 340 | AMH | Gravettian |
| Amalda | 28710 | 300 | AMH | Gravettian |
| Amalda | 17880 | 390 | AMH | Gravettian |
| Amalda | 28710 | 300 | NEA | Mousterian |
| Amalda | 28640 | 310 | NEA | Mousterian |
| Amalda | 44500 | 2100 | NEA | Mousterian |
| Amalda | 44500 | 2100 | NEA | Mousterian |
| Amalda | 42600 | 1600 | NEA | Mousterian |
| Amalda | 28710 | 300 | AMH | Mousterian |
| Amalda | 28640 | 310 | NEA | Mousterian |
| Amalda | 42600 | 1600 | NEA | Mousterian |
| Amalda | 44500 | 2100 | NEA | Mousterian |
| Ambrosio, Cueva de | 19950 | 70 | AMH | solutrense |
| Ambrosio, Cueva de | 20150 | 210 | AMH | solutrense |
| Ambrosio, Cueva de | 21520 | 200 | AMH | solutrense |
| Anecrial | 23410 | 170 | AMH | Gravettian |
| Anecrial | 23450 | 1470 | AMH | Gravettian |
| Anecrial | 24410 | 110 | AMH | Gravettian |
| Aranbaltza III | 75000 | 3000 | NEA | Mousterian |
| Aranbaltza III | 80100 | 4600 | NEA | Mousterian |
| Aranbaltza III | 36500 | 1800 | NEA | Mousterian |
| Aranbaltza III | 38200 | 2200 | NEA | Mousterian |
| Aranbaltza III | 41900 | 2100 | NEA | Mousterian |
| Aranbaltza III | 45800 | 2600 | NEA | Mousterian |
| Aranbaltza III | 63500 | 10300 | NEA | Mousterian |
| Arbreda | 44900 | 1900 | NEA | Mousterian |
| Arbreda | 71100 | 4000 | NEA | Mousterian |
| Arrillor Cave | 37100 | 1000 | NEA | Mousterian |
| Arrillor Cave | 43100 | 1700 | NEA | Mousterian |
| Arrillor Cave | 45400 | 1800 | NEA | Mousterian |
| Arrillor Cave | 45700 | 1200 | NEA | Mousterian |
| Axlor | 42010 | 1280 | NEA | Mousterian |
| Axlor | 43000 | 1000 | NEA | Mousterian |
| Axlor | 33310 | 360 | NEA | Mousterian |
| Axlor | 49300 | 2000 | NEA | Mousterian |
| Axlor | 49900 | 2000 | NEA | Mousterian |
| Beneito, Cueva | 20980 | 140 | AMH | solutrense |
| Boavista de Ferrel | 23450 | 2170 | AMH | Aurignacian |
| Boavista de Ferrel | 53000 | 1000 | NEA | Mousterian |
| Boavista de Ferrel | 56000 | 1000 | NEA | Mousterian |
| Boja, La | 20980 | 100 | AMH | solutrense |
| Bolinkoba | 29770 | 140 | AMH | Aurignacian |
| Bolinkoba | 30780 | 180 | AMH | Aurignacian |
| Bolinkoba | 30520 | 190 | AMH | Aurignacian |
| Bolinkoba | 29950 | 120 | AMH | Gravettian |
| Bolinkoba | 21020 | 90 | AMH | Gravettian |
| Bolinkoba | 25280 | 210 | AMH | Gravettian |
| Bolinkoba | 35050 | 650 | AMH | Gravettian |
| Bolinkoba | 49500 | 3900 | AMH | Gravettian |
| Buraca Escura | 22700 | 240 | AMH | Gravettian |
| Buraca Escura | 26560 | 450 | AMH | Gravettian |
| Buraca Grande | 23920 | 300 | AMH | Gravettian |
| Caldas, Las | 20250 | 330 | AMH | solutrense |
| Caldas, Las | 20530 | 260 | AMH | solutrense |
| Caldeirão, Gruta do | 27600 | 600 | AMH | Aurignacian |
| Caldeirão, Gruta do | 26020 | 320 | AMH | Gravettian |
| Caldeirão, Gruta do | 19900 | 270 | AMH | solutrense |
| Cardina I | 20700 | 1300 | AMH | Gravettian |
| Cardina I | 23400 | 1500 | AMH | Gravettian |
| Cardina I | 26500 | 1800 | AMH | Gravettian |
| Cardina I | 27000 | 1800 | AMH | Gravettian |
| Cardina I | 27800 | 1500 | AMH | Gravettian |
| Cardina I | 28000 | 2100 | AMH | Gravettian |
| Cardina I | 30100 | 1800 | AMH | Gravettian |
| Casal da Areia (Almeida Quarry) | 43540 | 3405 | NEA | Mousterian |
| Casalinhos (Óbidos) | 69120 | 4550 | NEA | Mousterian |
| Cendres, Cova de les | 19700 | 130 | AMH | solutrense |
| Cobrante | 30480 | 250 | AMH | Aurignacian |
| Cobrante | 33320 | 310 | AMH | Aurignacian |
| Cobrante | 35150 | 650 | AMH | Aurignacian |
| Cobrante | 44800 | 2000 | NEA | Mousterian |
| Conceição | 74500 | 11600 | NEA | Mousterian |
| Covalejos | 30380 | 250 | AMH | Aurignacian |
| Covalejos | 32840 | 250 | AMH | Aurignacian |
| Covalejos | 37940 | 350 | AMH | Aurignacian |
| Covalejos | 34350 | 600 | AMH | Aurignacian |
| Covalejos | 35150 | 650 | AMH | Aurignacian |
| Covalejos | 34850 | 600 | AMH | Aurignacian |
| Covalejos | 35250 | 700 | AMH | Aurignacian |
| Covalejos | 41640 | 650 | NEA | Mousterian |
| Covalejos | 40650 | 2300 | NEA | Mousterian |
| Covalejos | 43050 | 750 | NEA | Mousterian |
| CPM | 21080 | 850 | AMH | Gravettian |
| CPM | 22710 | 350 | AMH | Gravettian |
| CPM | 23050 | 750 | AMH | Gravettian |
| CPM | 23490 | 280 | AMH | Gravettian |
| Cuco 08 | 33080 | 200 | NEA | Mousterian |
| Cuco 09 | 29810 | 150 | NEA | Mousterian |
| Cuco 09 | 31280 | 160 | NEA | Mousterian |
| Cuco 10 | 31670 | 190 | NEA | Mousterian |
| Cuco 11 | 34180 | 240 | NEA | Mousterian |
| Cuco 12 | 33130 | 240 | NEA | Mousterian |
| Cuco 13 | 36160 | 280 | NEA | Mousterian |
| Cuco 14 | 43500 | 1000 | NEA | Mousterian |
| Cuco 15 | 41600 | 550 | NEA | Mousterian |
| Cuco 16 | 43500 | 1000 | NEA | Mousterian |
| Cuco 17 | 42350 | 700 | NEA | Mousterian |
| Cuco 18 | 46200 | 650 | NEA | Mousterian |
| Cuco 19 | 43500 | 500 | NEA | Mousterian |
| Cuco 20 | 46400 | 800 | NEA | Mousterian |
| Cuco 21 | 49500 | 390 | NEA | Mousterian |
| Cuco 22 | 30020 | 160 | AMH | Aurignacian |
| Cueva de los Moros | 39900 | 1000 | NEA | Mousterian |
| Cueva de los Moros | 45900 | 1000 | NEA | Mousterian |
| Cueva Morin | 27565 | 565 |  | Aurignacian |
| Cueva Morin | 26105 | 1535 |  | Aurignacian |
| Cueva Morin | 31740 | 865 |  | Aurignacian |
| Cueva Morin | 36590 | 770 |  | Aurignacian |
| Cueva Morin | 27260 | 1500 | AMH | Aurignacian |
| Cueva Morin | 28680 | 840 | AMH | Aurignacian |
| Cueva Morin | 31500 | 880 | AMH | Aurignacian |
| Cueva Morin | 27360 | 740 | AMH | Aurignacian |
| Cueva Morin | 27630 | 540 | AMH | Aurignacian |
| Cueva Morin | 27710 | 1300 | AMH | Aurignacian |
| Cueva Morin | 33430 | 250 | AMH | Aurignacian |
| Cueva Morin | 36590 | 770 | AMH | Aurignacian |
| Cueva Morin | 40060 | 350 | AMH | Aurignacian |
| Cueva Morin | 35875 | 678 |  | Chatelperronian |
| Cueva Morin | 29380 | 250 |  | Chatelperronian |
| Cueva Morin | 27800 | 560 | AMH | Chatelperronian |
| Cueva Morin | 29380 | 260 | AMH | Chatelperronian |
| Cueva Morin | 30340 | 2000 | AMH | Chatelperronian |
| Cueva Morin | 28700 |  | AMH | Gravettian |
| Cueva Morin | 28580 |  | AMH | Gravettian |
| Cueva Morin | 15240 |  | AMH | Gravettian |
| Cueva Morin | 18270 |  | AMH | Gravettian |
| Cueva Morin | 22420 |  | AMH | Gravettian |
| Cueva Morin | 18270 | 130 | AMH | Gravettian |
| Cueva Morin | 22420 | 200 | AMH | Gravettian |
| Cueva Morin | 23640 | 190 | AMH | Gravettian |
| Cueva Morin | 23790 | 190 | AMH | Gravettian |
| Cueva Morin | 20120 | 340 | AMH | Gravettian |
| Cueva Morin | 42000 | 730 | NEA | Mousterian |
| Cueva Morin | 41800 | 450 | NEA | Mousterian |
| Cueva Morin | 43600 | 600 | NEA | Mousterian |
| Cueva Morin | 40060 | 350 | NEA | Mousterian |
| Cueva Morin | 41800 | 450 | NEA | Mousterian |
| Cueva Morin | 42000 | 730 | NEA | Mousterian |
| Cueva Morin | 43600 | 600 | NEA | Mousterian |
| Ekain | 31110 | 400 | AMH | Aurignacian |
| Ekain | 31140 | 400 | AMH | Aurignacian |
| Ekain | 34350 | 550 | AMH | Châtelperronian |
| El Fuso | 28510 | 300 | AMH | Aurignacian |
| El Castillo | 38600 | 1000 | AMH | Aurignacian |
| El Castillo | 38500 | 1800 | AMH | Aurignacian |
| El Castillo | 37100 | 2200 | AMH | Aurignacian |
| El Castillo | 37700 | 1800 | AMH | Aurignacian |
| El Castillo | 38500 | 1500 | AMH | Aurignacian |
| El Castillo | 40000 | 2100 | AMH | Aurignacian |
| El Castillo | 40700 | 1500 | AMH | Aurignacian |
| El Castillo | 41100 | 1700 | AMH | Aurignacian |
| El Castillo | 42200 | 2100 | AMH | Aurignacian |
| El Castillo | 37000 | 2400 | AMH | Aurignacian |
| El Castillo | 43100 | 1700 | AMH | Aurignacian |
| El Castillo | 49400 | 3700 | NEA | Mousterian |
| El Castillo | 75000 | 4400 | NEA | Mousterian |
| El Cuco | 42350 | 700 | NEA | Mousterian |
| El Cuco | 43500 | 1000 | NEA | Mousterian |
| El Cuco | 46200 | 650 | NEA | Mousterian |
| El Cuco | 46400 | 800 | NEA | Mousterian |
| El Miron Cave | 27580 | 120 | AMH | Gravettian |
| El Miron Cave | 41280 | 1120 | NEA | Mousterian |
| El Miron Cave | 45900 | 5000 | NEA | Mousterian |
| El Miron Cave | 48200 | 3300 | NEA | Mousterian |
| El Otero | 12415 | 55 | AMH | Magdalenian |
| El Otero | 12340 | 55 | AMH | Magdalenian |
| El Otero | 10585 | 50 | AMH | Magdalenian |
| El Otero | 15990 | 80 | AMH | Magdalenian |
| El Ruso I | 27620 | 180 | AMH | Aurignacian |
| El Ruso I | 30200 | 136 | AMH | Aurignacian |
| El Ruso I | 28510 | 300 | AMH | Aurignacian |
| Ermitons Cave | 36430 | 1800 | NEA | Mousterian |
| Ermitons Cave | 33190 | 660 | NEA | Mousterian |
| Esquilleu | 30250 | 500 | NEA | Mousterian |
| Esquilleu | 34380 | 670 | NEA | Mousterian |
| Esquilleu | 36500 | 830 | NEA | Mousterian |
| Esquilleu | 39000 | 300 | NEA | Mousterian |
| Esquilleu | 40110 | 500 | NEA | Mousterian |
| Esquilleu | 49700 | 1600 | NEA | Mousterian |
| Esquilleu | 51034 | 5114 | NEA | Mousterian |
| Esquilleu | 53491 | 5114 | NEA | Mousterian |
| Fonte Santa | 35300 | 3600 | AMH | Gravettian |
| Fonte Santa | 39300 | 4700 | AMH | Gravettian |
| Fonte Santa | 40400 | 4600 | AMH | Gravettian |
| Forte da Barralha | 65665 | 6120 | NEA | Mousterian |
| Foz do Enxarrique | 32938 | 1055 | NEA | Mousterian |
| Foz do Enxarrique | 34088 | 800 | NEA | Mousterian |
| Foz do Enxarrique | 34093 | 920 | NEA | Mousterian |
| Foz do Enxiarrique | 32938 | 1055 | NEA | Mousterian |
| Foz do Enxiarrique | 34088 | 800 | NEA | Mousterian |
| Foz do Enxiarrique | 34093 | 920 | NEA | Mousterian |
| Gato Preto | 36500 | 4500 | AMH | Solutrean |
| Gato Preto | 40700 | 5600 | AMH | Solutrean |
| Gorham's Cave | 20220 | 160 | AMH | solutrense |
| Gruta da Figueira Brava | 35174 | 661 | NEA | Mousterian |
| Gruta da Oliveira | 27850 | 550 | NEA | Mousterian |
| Gruta da Oliveira | 35760 | 280 | NEA | Mousterian |
| Gruta da Oliveira | 37100 | 830 | NEA | Mousterian |
| Gruta da Oliveira | 41960 | 330 | NEA | Mousterian |
| Gruta da Oliveira | 42160 | 340 | NEA | Mousterian |
| Gruta da Oliveira | 42610 | 390 | NEA | Mousterian |
| Gruta da Oliveira | 43310 | 490 | NEA | Mousterian |
| Gruta da Oliveira | 44080 | 990 | NEA | Mousterian |
| Gruta da Oliveira | 44380 | 960 | NEA | Mousterian |
| Gruta da Oliveira | 46070 | 1330 | NEA | Mousterian |
| Gruta da Oliveira | 46350 | 2050 | NEA | Mousterian |
| Gruta da Oliveira | 49600 | 2000 | NEA | Mousterian |
| Gruta da Oliveira | 70250 | 9000 | NEA | Mousterian |
| Gruta das Pulgas | 184000 | 1000 | NEA | Mousterian |
| Gruta do Caldeirão | 21255 | 159 | NEA | Mousterian |
| Gruta do Caldeirão | 26069 | 293 | NEA | Mousterian |
| Gruta do Caldeirão | 30095 | 271 | NEA | Mousterian |
| Gruta do Caldeirão | 31358 | 633 | NEA | Mousterian |
| Gruta do Caldeirão | 32314 | 522 | NEA | Mousterian |
| Gruta do Escoural | 26400 | 11000 | NEA | Gravettian |
| Gruta do Escoural | 39800 | 10000 | NEA | Mousterian |
| Gruta do Escoural | 36500 | 750 | NEA | Mousterian |
| Gruta do Escoural | 48900 | 5800 | NEA | Mousterian |
| Gruta Figueira Brava | 30561 | 11759 | NEA | Mousterian |
| Gruta Figueira Brava | 33374 | 854 | NEA | Mousterian |
| Gruta Figueira Brava | 34878 | 787 | NEA | Mousterian |
| Gruta Figueira Brava | 44806 | 2100 | NEA | Mousterian |
| Gruta Nova da Columbeira | 22350 | 990 | AMH | Aurignacian |
| Gruta Nova da Columbeira | 26400 | 750 | NEA | Mousterian |
| Gruta Nova da Columbeira | 28900 | 950 | NEA | Mousterian |
| Gruta Nova da Columbeira | 26400 | 700 | NEA | Mousterian |
| Gruta Nova da Columbeira | 28900 | 950 | NEA | Mousterian |
| Gruta Nova da Columbeira | 35876 | 5000 | NEA | Mousterian |
| Gruta Nova de Columbeira | 31135 | 589 | NEA | Mousterian |
| Gruta Nova de Columbeira | 33252 | 818 | NEA | Mousterian |
| L´Arbreda | 22600 | 290 | AMH | Aurignacian |
| L´Arbreda | 25800 | 400 | AMH | Aurignacian |
| L´Arbreda | 37100 | 1000 | AMH | Aurignacian |
| L´Arbreda | 37700 | 1000 | AMH | Aurignacian |
| L´Arbreda | 38700 | 1200 | AMH | Aurignacian |
| L´Arbreda | 39900 | 1300 | AMH | Aurignacian |
| L´Arbreda | 39400 | 1400 | NEA | Mousterian |
| L´Arbreda | 41400 | 1600 | NEA | Mousterian |
| L´Arbreda | 39900 | 1200 | NEA | Mousterian |
| L´Arbreda | 44560 | 600 | NEA | Mousterian |
| L´Arbreda | 34100 | 750 | NEA | Mousterian |
| L´Arbreda | 39400 | 1400 | NEA | Mousterian |
| L´Arbreda | 41400 | 1600 | NEA | Mousterian |
| La Boja | 20440 | 1270 | AMH | Gravettian |
| La Boja | 20350 | 90 | AMH | Gravettian |
| La Boja | 20395 | 64 | AMH | Gravettian |
| La Boja | 20580 | 90 | AMH | Gravettian |
| La Roca del Bous | 46900 | 1000 | NEA | Mousterian |
| La Roca del Bous | 38800 | 1200 | NEA | Mousterian |
| La Vina | 31860 | 680 | AMH | Aurignacian |
| La Vina | 31160 | 360 | AMH | Aurignacian |
| La Vina | 30650 | 230 | AMH | Aurignacian |
| La Vina | 31600 | 400 | AMH | Aurignacian |
| La Vina | 31500 | 400 | AMH | Aurignacian |
| La Vina | 30600 | 370 | AMH | Aurignacian |
| La Vina | 30130 | 170 | AMH | Aurignacian |
| La Vina | 27900 | 280 | AMH | Aurignacian |
| La Vina | 23930 | 180 | AMH | Gravettian |
| La Vina | 23960 | 180 | AMH | Gravettian |
| La Vina | 25000 | 200 | AMH | Gravettian |
| La Vina | 28360 | 290 | AMH | Gravettian |
| La Vina | 28560 | 300 | AMH | Gravettian |
| La Vina | 36500 | 750 | AMH | Gravettian |
| La Vina | 24640 | 190 | AMH | Gravettian |
| La Vina | 28940 | 310 | AMH | Gravettian |
| Lagar Velho | 21420 | 220 | AMH | Gravettian |
| Lagar Velho | 21980 | 100 | AMH | Gravettian |
| Lagar Velho | 22390 | 280 | AMH | Gravettian |
| Lagar Velho | 22493 | 107 | AMH | Gravettian |
| Lagar Velho | 22720 | 90 | AMH | Gravettian |
| Lagar Velho | 23042 | 142 | AMH | Gravettian |
| Lagar Velho | 23130 | 130 | AMH | Gravettian |
| Lagar Velho | 23170 | 140 | AMH | Gravettian |
| Lagar Velho | 23920 | 220 | AMH | Gravettian |
| Lagar Velho | 24520 | 240 | AMH | Gravettian |
| Lagar Velho | 24660 | 260 | AMH | Gravettian |
| Lagar Velho | 24860 | 200 | AMH | Gravettian |
| Lagar Velho | 24950 | 240 | AMH | Gravettian |
| Lagar Velho | 27100 | 900 | AMH | Gravettian |
| Lagar Velho | 21180 | 240 | AMH | Solutrean |
| Lagar Velho | 21230 | 810 | AMH | Solutrean |
| Lagar Velho | 22180 | 180 | AMH | Solutrean |
| Lagar Velho | 20520 | 180 | AMH | solutrense |
| Lapa do Picareiro | 28330 | 90 | AMH | Aurignacian |
| Lapa do Picareiro | 30027 | 207 | AMH | Aurignacian |
| Lapa do Picareiro | 30260 | 130 | AMH | Aurignacian |
| Lapa do Picareiro | 30560 | 120 | AMH | Aurignacian |
| Lapa do Picareiro | 30790 | 120 | AMH | Aurignacian |
| Lapa do Picareiro | 32063 | 336 | AMH | Aurignacian |
| Lapa do Picareiro | 32200 | 90 | AMH | Aurignacian |
| Lapa do Picareiro | 32340 | 140 | AMH | Aurignacian |
| Lapa do Picareiro | 32400 | 140 | AMH | Aurignacian |
| Lapa do Picareiro | 32997 | 263 | AMH | Aurignacian |
| Lapa do Picareiro | 33238 | 419 | AMH | Aurignacian |
| Lapa do Picareiro | 33790 | 190 | AMH | Aurignacian |
| Lapa do Picareiro | 33880 | 160 | AMH | Aurignacian |
| Lapa do Picareiro | 33910 | 160 | AMH | Aurignacian |
| Lapa do Picareiro | 36390 | 210 | AMH | Aurignacian |
| Lapa do Picareiro | 36670 | 220 | AMH | Aurignacian |
| Lapa do Picareiro | 25579 | 173 | AMH | Gravettian |
| Lapa do Picareiro | 26505 | 270 | AMH | Gravettian |
| Lapa do Picareiro | 26680 | 80 | AMH | Gravettian |
| Lapa do Picareiro | 26680 | 80 | AMH | Gravettian |
| Lapa do Picareiro | 27230 | 80 | AMH | Gravettian |
| Lapa do Picareiro | 28161 | 329 | AMH | Gravettian |
| Lapa do Picareiro | 28330 | 90 | AMH | Gravettian |
| Lapa do Picareiro | 28430 | 210 | AMH | Gravettian |
| Lapa do Picareiro | 29054 | 224 | AMH | Gravettian |
| Lapa do Picareiro | 22560 | 110 | AMH | Gravettian |
| Lapa do Picareiro | 22590 | 110 | AMH | Gravettian |
| Lapa do Picareiro | 22660 | 240 | AMH | Gravettian |
| Lapa do Picareiro | 23097 | 131 | AMH | Gravettian |
| Lapa do Picareiro | 23850 | 60 | AMH | Gravettian |
| Lapa do Picareiro | 38990 | 280 | NEA | Mousterian |
| Lapa do Picareiro | 39270 | 290 | NEA | Mousterian |
| Lapa do Picareiro | 40078 | 1239 | NEA | Mousterian |
| Lapa do Picareiro | 41360 | 370 | NEA | Mousterian |
| Lapa do Picareiro | 41480 | 220 | NEA | Mousterian |
| Lapa do Picareiro | 41980 | 400 | NEA | Mousterian |
| Lapa do Picareiro | 47510 | 760 | NEA | Mousterian |
| Lapa do Picareiro | 48000 | 820 | NEA | Mousterian |
| Lapa dos Furos | 38697 | 1518 | NEA | Mousterian |
| Lapa dos Furos | 39990 | 1010 | NEA | Mousterian |
| Llonin | 28390 | 350 | AMH | Gravettian |
| Llonin | 34100 | 1240 | NEA | Mousterian |
| Llonin | 29995 | 1045 | NEA | Mousterian |
| Llonin | 20040 | 120 | AMH | Solutrean |
| Mira Nascente | 20628 | 292 | NEA | Mousterian |
| MIra Nascente | 20628 | 292 | NEA | Mousterian |
| Mira Nascente | 26110 | 499 | NEA | Mousterian |
| MIra Nascente | 26110 | 499 | NEA | Mousterian |
| Mira Nascente | 33905 | 2690 | NEA | Mousterian |
| MIra Nascente | 33905 | 2690 | NEA | Mousterian |
| Mira Nascente | 33905 | 2690 | NEA | Mousterian |
| Mira Nascente | 34300 | 2630 | NEA | Mousterian |
| MIra Nascente | 34300 | 2630 | NEA | Mousterian |
| Mira Nascente | 34300 | 2630 | NEA | Mousterian |
| Mira Nascente | 36030 | 710 | NEA | Mousterian |
| Mira Nascente | 36030 | 2750 | NEA | Mousterian |
| Mira Nascente | 36035 | 2750 | NEA | Mousterian |
| MIra Nascente | 36035 | 2750 | NEA | Mousterian |
| Mira Nascente | 36720 | 270 | NEA | Mousterian |
| Mira Nascente | 37570 | 600 | NEA | Mousterian |
| Mira Nascente | 40450 | 2980 | NEA | Mousterian |
| MIra Nascente | 40450 | 2980 | NEA | Mousterian |
| Mira Nascente | 40450 | 2980 | NEA | Mousterian |
| MIra Nascente | 40744 | 1025 | NEA | Mousterian |
| Mira Nascente | 41717 | 311 | NEA | Mousterian |
| MIra Nascente | 41717 | 311 | NEA | Mousterian |
| Mira Nascente | 42175 | 461 | NEA | Mousterian |
| MIra Nascente | 42175 | 461 | NEA | Mousterian |
| Mira Nascente | 47890 | 1000 | NEA | Mousterian |
| Mira Nascente | 50100 | 160 | NEA | Mousterian |
| Mira Nascente | 50220 | 50 | NEA | Mousterian |
| Mira Nascente | 61790 | 150 | NEA | Mousterian |
| MIra Nascente | 110050 | 8460 | NEA | Mousterian |
| Mira Nascente | 110050 | 8460 | NEA | Mousterian |
| Mira Nascente | 124000 | 5000 | NEA | Mousterian |
| Mira Nascente | 139690 | 680 | NEA | Mousterian |
| Mira Nascente | 140080 | 80 | NEA | Mousterian |
| Mira Nascente | 150920 | 12575 | NEA | Mousterian |
| MIra Nascente | 150920 | 12575 | NEA | Mousterian |
| Mira Nascente | 150920 | 12575 | NEA | Mousterian |
| Mira Nascente | 21810 | 160 | AMH | solutrense |
| Morín, Cueva | 21140 | 130 | AMH | solutrense |
| Olga Grande 4 | 26800 | 2300 | AMH | Gravettian |
| Olga Grande 4 | 27200 | 2300 | AMH | Gravettian |
| Olga Grande 4 | 28500 | 2300 | AMH | Gravettian |
| Olga Grande 4 | 30000 | 2400 | AMH | Gravettian |
| Olga Grande 4 | 31000 | 2500 | AMH | Gravettian |
| Parpalló, Cueva del | 19930 | 100 | AMH | solutrense |
| Pedreira de Salemas | 34030 | 1267 | NEA | Mousterian |
| Pedreira de Salemas | 34650 | 880 | NEA | Mousterian |
| Pego do Diabo | 23080 | 490 | AMH | Gravettian |
| Pego do Diabo | 27290 | 230 | AMH | Gravettian |
| Pego do Diabo | 27740 | 250 | AMH | Gravettian |
| Pego do Diabo | 28040 | 250 | AMH | Gravettian |
| Pego do Diabo | 28120 | 820 | AMH | Gravettian |
| Pego do Diabo | 28320 | 280 | AMH | Gravettian |
| Pego do Diabo | 28360 | 270 | AMH | Gravettian |
| Pego do Diabo | 28820 | 270 | AMH | Gravettian |
| Pego do Diabo | 29090 | 270 | AMH | Gravettian |
| Pego do Diabo | 29150 | 280 | AMH | Gravettian |
| Pego do Diabo | 29640 | 320 | AMH | Gravettian |
| Pego do Diabo | 29810 | 310 | AMH | Gravettian |
| Pego do Diabo | 30260 | 330 | AMH | Gravettian |
| Pego do Diabo | 30290 | 320 | AMH | Gravettian |
| Pêgo do Diabo | 21973 | 689 | NEA | Mousterian |
| Pêgo do Diabo | 34900 | 1000 | NEA | Mousterian |
| Pêgo do Diabo | 38750 | 650 | NEA | Mousterian |
| Pêgo do Diabo | 170000 | 13000 | NEA | Mousterian |
| Peña Capón, Cueva de | 19980 | 110 | AMH | solutrense |
| Peña Capón, Cueva de | 21220 | 110 | AMH | solutrense |
| Pena Miel | 37700 | 1300 | NEA | Mousterian |
| Pena Miel | 39900 | 1050 | NEA | Mousterian |
| Pena Miel | 40300 | 1600 | NEA | Mousterian |
| Pena Miel | 45500 | 1200 | NEA | Mousterian |
| Picareiro | 22190 | 80 | AMH | Gravettian |
| Picareiro | 22560 | 110 | AMH | Gravettian |
| Picareiro | 22590 | 110 | AMH | Gravettian |
| Picareiro | 22660 | 240 | AMH | Gravettian |
| Picareiro | 25579 | 173 | AMH | Gravettian |
| Picareiro | 26505 | 270 | AMH | Gravettian |
| Picareiro | 28161 | 329 | AMH | Gravettian |
| Picareiro | 29054 | 224 | AMH | Gravettian |
| Polvoeira | 36250 | 2840 | NEA | Mousterian |
| Polvoeira | 57400 | 1380 | NEA | Mousterian |
| Polvoeira | 62220 | 4660 | NEA | Mousterian |
| Polvoeira | 62690 | 450 | NEA | Mousterian |
| Praia de Rei Cortiço | 25315 | 1595 | NEA | Mousterian |
| Praia de Rei Cortiço | 51165 | 3865 | NEA | Mousterian |
| Praia de Rei Cortiço | 53370 | 3290 | NEA | Mousterian |
| Praia de Rei Cortiço | 66950 | 4790 | NEA | Mousterian |
| Praia de Rei Cortiço | 68320 | 5530 | NEA | Mousterian |
| Praia de Rei Cortiço | 69380 | 5660 | NEA | Mousterian |
| Praia de Rei Cortiço | 79800 | 5695 | NEA | Mousterian |
| Praia de Rei Cortiço | 95370 | 6470 | NEA | Mousterian |
| Praia de Rei Cortiço | 101010 | 7870 | NEA | Mousterian |
| Praia de Rei Cortiço | 111250 | 8800 | NEA | Mousterian |
| Praia de Rei Cortiço | 117670 | 10000 | NEA | Mousterian |
| Praia del Rei | 26350 | 2005 | NEA | Mousterian |
| Praia del Rei | 71850 | 5530 | NEA | Mousterian |
| Praia del Rei | 89000 | 10000 | NEA | Mousterian |
| Praia del Rei | 150325 | 13410 | NEA | Mousterian |
| Praia Rei Cortiço | 33580 | 270 | NEA | Mousterian |
| Praia Rei Cortiço | 40744 | 1025 | NEA | Mousterian |
| Praia Rei Cortiço | 46850 | 250 | NEA | Mousterian |
| Praia Rei Cortiço | 49590 | 310 | NEA | Mousterian |
| Praia Rei Cortiço | 49600 | 1000 | NEA | Mousterian |
| Praia Rei Cortiço | 49600 | 1000 | NEA | Mousterian |
| Praia Rei Cortiço | 49600 | 2000 | NEA | Mousterian |
| Praia Rei Cortiço | 50356 | 1854 | NEA | Mousterian |
| Praia Rei Cortiço | 50356 | 1854 | NEA | Mousterian |
| Praia Rei Cortiço | 53781 | 2055 | NEA | Mousterian |
| Praia Rei Cortiço | 53781 | 2055 | NEA | Mousterian |
| Praia Rei Cortiço | 55000 | 1000 | NEA | Mousterian |
| Praia Rei Cortiço | 71630 | 2580 | NEA | Mousterian |
| Praia Rei Cortiço | 101010 | 7870 | NEA | Mousterian |
| Praia Rei Cortiço | 101010 | 7870 | NEA | Mousterian |
| Rellau Viver | 30190 | 500 | AMH | Aurignacian |
| Rellau Viver | 40000 | 1400 | NEA | Mousterian |
| Ribeira da Atalaia | 24750 | 1571 | AMH | Solutrean |
| Ribeira da Atalaia | 24810 | 2164 | AMH | Solutrean |
| Ribeira da Atalaia | 24897 | 2194 | AMH | Solutrean |
| Ruso, El | 19910 | 210 | AMH | solutrense |
| Salemas [algar] | 24090 | 533 | AMH | Gravettian |
| Salemas [algar] | 27457 | 1127 | AMH | Gravettian |
| Salemas [algar] | 28118 | 924 | NEA | Mousterian |
| Salemas [gruta] | 28118 | 924 | NEA | Mousterian |
| Salemas [gruta] | 29200 | 2000 | NEA | Mousterian |
| Salemas [gruta] | 30696 | 1142 | NEA | Mousterian |
| Santa Maira | 20380 | 100 | AMH | solutrense |
| São Pedro de Muel | 35260 | 2590 | NEA | Mousterian |
| São Pedro de Muel | 35530 | 2785 | NEA | Mousterian |
| São Pedro de Muel | 39450 | 2980 | NEA | Mousterian |
| São Pedro de Muel | 41660 | 740 | NEA | Mousterian |
| São Pedro de Muel | 46660 | 3570 | NEA | Mousterian |
| São Pedro de Muel | 56080 | 500 | NEA | Mousterian |
| São Pedro de Muel | 62520 | 110 | NEA | Mousterian |
| São Pedro de Muel | 71510 | 830 | NEA | Mousterian |
| Terra do Manuel | 21770 | 210 | AMH | Solutrean |
| Vale Almoinha / Vale da Fonte | 19940 | 150 | AMH | solutrense |
| Vale Boi | 25579 | 98 | AMH | Gravettian |
| Vale Boi | 25930 | 122 | AMH | Gravettian |
| Vale Boi | 25964 | 110 | AMH | Gravettian |
| Vale Boi | 26026 | 114 | AMH | Gravettian |
| Vale Boi | 26353 | 284 | AMH | Gravettian |
| Vale Boi | 27141 | 363 | AMH | Gravettian |
| Vale Boi | 28012 | 192 | AMH | Gravettian |
| Vale Boi | 28140 | 195 | AMH | Gravettian |
| Vale Boi | 28321 | 422 | AMH | Gravettian |
| Vale Boi | 21859 | 189 | AMH | Gravettian |
| Vale Boi | 22470 | 235 | AMH | Gravettian |
| Vale Boi | 23613 | 240 | AMH | Gravettian |
| Vale Boi | 23995 | 230 | AMH | Gravettian |
| Vale Boi | 24183 | 161 | AMH | Gravettian |
| Vale Boi | 24300 | 205 | AMH | Gravettian |
| Vale Boi | 24381 | 258 | AMH | Gravettian |
| Vale Boi | 24500 | 570 | AMH | Gravettian |
| Vale Boi | 24549 | 165 | AMH | Gravettian |
| Vale Boi | 24769 | 180 | AMH | Gravettian |
| Vale Boi | 25050 | 100 | AMH | Gravettian |
| Vale Boi | 25181 | 293 | AMH | Gravettian |
| Vale Boi | 25196 | 103 | AMH | Gravettian |
| Vale Boi | 27720 | 370 | NEA | Mousterian |
| Vale Boi | 21420 | 100 | AMH | Solutrean |
| Vale Boi | 21830 | 195 | AMH | Solutrean |
| Vale Boi | 20340 | 92 | AMH | solutrense |
| Vale Boi | 20620 | 90 | AMH | solutrense |
| Vale Comprido Cru. | 26700 | 2700 | AMH | Gravettian |
| Vale Comprido Cru. | 30300 | 3900 | AMH | Gravettian |
| Vale do Forno 8 | 33632 | 1180 | NEA | Mousterian |
| Vale Pardo | 62855 | 4590 | NEA | Mousterian |
| Valin | 34800 | 1500 | AMH | Chatelperronian |
| Valin | 31720 | 2110 | AMH | Chatelperronian |
| Valin | 31600 | 250 | AMH | Chatelperronian |
| Valongo (Campo) Quarry | 49520 | 3690 | NEA | Mousterian |
| Valongo (Campo) Quarry | 193910 | 14360 | NEA | Mousterian |
| Zafarraya VI | 23380 | 500 | AMH | Upper Paleolithic |
| Zafarraya VI | 29500 | 2700 | AMH | Upper Paleolithic |
| Zafarraya VI | 32600 | 1800 | AMH | Upper Paleolithic |
| Zafarraya | 31800 | 550 | AMH | Upper Paleolithic |
| Zafarraya | 22100 | 1000 | AMH | Upper Paleolithic |
| Zafarraya | 31700 | 3600 | AMH | Upper Paleolithic |
| Zafarraya | 29800 | 600 | AMH | Upper Paleolithic |
| Zafarraya | 23600 | 1000 | AMH | Upper Paleolithic |
| Zafarraya | 25100 | 1300 | AMH | Upper Paleolithic |
| Zafarraya | 26900 | 2700 | AMH | Upper Paleolithic |
| Zafarraya | 28900 | 4200 | AMH | Upper Paleolithic |
| Zafarraya | 33400 | 2000 | AMH | Upper Paleolithic |
| Zafarraya | 19700 | 2200 | AMH | Upper Paleolithic |
| Zafarraya | 28211 |  | AMH | Upper Paleolithic |
| Zafarraya | 21400 | 1400 | AMH | Upper Paleolithic |
| Zafarraya | 53366 | 4556 | NEA | Mousterian |
| Zafarraya | 32400 | 3200 | NEA | Mousterian |
| Zafarraya | 32700 | 4900 | AMH | Upper Paleolithic |
| Zafarraya | 29900 | 3600 | AMH | Upper Paleolithic |
| Zafarraya | 32800 | 2100 | AMH | Upper Paleolithic |
| Zafarraya | 47200 | 3700 | NEA | Mousterian |
| Zafarraya | 35424 |  | AMH | Upper Paleolithic |
| Zafarraya | 56700 | 3900 | NEA | Mousterian |
| Zafarraya | 40824 |  | NEA | Mousterian |
| Zafarraya | 28432 | 1414 | NEA | Mousterian |
| Zafarraya | 36000 | 3600 | NEA | Mousterian |
| Zafarraya | 40200 | 6100 | NEA | Mousterian |
| Zafarraya | 24300 | 1700 | AMH | Upper Paleolithic |
| Zafarraya | 28900 | 2100 | AMH | Upper Paleolithic |
| Zafarraya | 18094 | 129 | AMH | Upper Paleolithic |
| Zafarraya | 30200 | 460 | AMH | Upper Paleolithic |
| Zafarraya | 42123 | 460 | NEA | Mousterian |
| Zafarraya | 29300 | 1400 | AMH | Upper Paleolithic |
| Zafarraya | 26312 | 966 | AMH | Upper Paleolithic |
| Zafarraya | 34400 | 3500 | AMH | Upper Paleolithic |
| Zafarraya | 38900 | 6100 | AMH | Upper Paleolithic |
| Zafarraya | 23100 | 1500 | AMH | Upper Paleolithic |
| Zafarraya | 26600 | 2500 | AMH | Upper Paleolithic |
| Zafarraya | 24200 | 2100 | AMH | Upper Paleolithic |
| Zafarraya | 16965 | 16965 | AMH | Upper Paleolithic |
| Zafarraya | 26300 | 440 | AMH | Upper Paleolithic |
| Zafarraya | 45704 | 45704 | NEA | Mousterian |
| Zafarraya | 30885 | 2439 | AMH | Upper Paleolithic |
| Zafarraya | 18700 | 1900 | AMH | Upper Paleolithic |
| Zafarraya | 18900 | 2900 | AMH | Upper Paleolithic |
| Zafarraya | 30000 | 2500 | AMH | Upper Paleolithic |
| Zafarraya | 65125 | 7953 | NEA | Mousterian |
| Zafarraya | 59700 | 2200 | NEA | Mousterian |
| Zafarraya | 24900 | 2500 | AMH | Upper Paleolithic |
| Zafarraya | 25100 | 3800 | AMH | Upper Paleolithic |
| Zafarraya | 48600 | 5400 | NEA | Mousterian |
| Zafarraya | 45300 | 2100 | NEA | Mousterian |
| Zafarraya | 28300 | 1600 | AMH | Upper Paleolithic |
| Zafarraya | 31600 | 2300 | AMH | Upper Paleolithic |
| Zafarraya | 33300 | 1200 | AMH | Upper Paleolithic |
| Zafarraya | 40900 | 1300 | NEA | Mousterian |
| Zafarraya | 47500 | 1700 | NEA | Mousterian |
| Zafarraya | 30650 | 650 | AMH | Upper Paleolithic |
| Zafarraya | 46500 | 3200 | NEA | Mousterian |
| Zafarraya | 38600 | 2700 | NEA | Mousterian |
| Zafarraya | 60000 | 3700 | NEA | Mousterian |
| Zafarraya | 23000 | 5000 | AMH | Upper Paleolithic |
| Zafarraya | 49000 | 11000 | NEA | Mousterian |
| Zafarraya | 15000 | 7000 | AMH | Upper Paleolithic |
| Zafarraya | 33000 | 17000 | AMH | Upper Paleolithic |
| Zafarraya | 86000 | 73000 | NEA | Mousterian |
| Zafarraya | 14930 | 90 | AMH | Upper Paleolithic |
| Zafarraya | 30900 | 1300 | AMH | Upper Paleolithic |
| Zafarraya | 18920 | 420 | AMH | Upper Paleolithic |
| Zafarraya | 270 | 35 | AMH | Upper Paleolithic |
| Zafarraya | 18980 | 260 | AMH | Upper Paleolithic |
| Zafarraya | 595 | 35 | AMH | Upper Paleolithic |
| Zafarraya | 1310 | 60 | AMH | Upper Paleolithic |
| Zafarraya | 11620 | 360 | AMH | Upper Paleolithic |
| Zafarraya | 1205 | 65 | AMH | Upper Paleolithic |
| Zafarraya | 36900 | 3000 | AMH | Upper Paleolithic |
| Zafarraya | 6710 | 80 | AMH | Upper Paleolithic |
| Bajondillo | 28660 | 120 | AMH | Gravettian |
| Bajondillo | 28880 | 240 |  | Aurignacian |
| Bajondillo | 28970 | 240 |  | Aurignacian |
| Bajondillo | 29040 | 220 |  | Aurignacian |
| Bajondillo | 29180 | 220 |  | Aurignacian |
| Bajondillo | 31280 | 280 |  | Aurignacian |
| Bajondillo | 32780 | 340 |  | Aurignacian |
| Bajondillo | 32770 | 1065 |  | Aurignacian |
| Bajondillo | 36890 | 200 |  | Aurignacian |
| Bajondillo | 36890 | 210 |  | Aurignacian |
| Bajondillo | 37005 | 1790 |  | Aurignacian |
| Bajondillo | 37430 | 570 |  | Aurignacian |
| Bajondillo | 38160 | 230 |  | Aurignacian |
| Bajondillo | 39270 | 870 |  | Aurignacian |
| Bajondillo | 43840 | 490 |  | Mousterian |
| Bajondillo | 42710 | 1120 |  | Mousterian |
| Bajondillo | 44020 | 1290 |  | Mousterian |
| Bajondillo | 46610 | 1740 |  | Mousterian |
| Bajondillo | 46890 | 1810 |  | Mousterian |
| Bajondillo | 48410 | 2410 |  | Mousterian |
| Gorham's Cave | 13870 | 80 |  | Gravettian |
| Gorham's Cave | 10880 | 80 |  | Gravettian |
| Gorham's Cave | 12460 | 100 |  | Gravettian |
| Gorham's Cave | 12640 | 100 |  | Gravettian |
| Gorham's Cave | 13820 | 100 |  | Gravettian |
| Gorham's Cave | 12540 | 100 |  | Gravettian |
| Gorham's Cave | 16420 | 120 |  | Gravettian |
| Gorham's Cave | 18440 | 160 |  | Aurignacian |
| Gorham's Cave | 26070 | 360 |  | Mousterian |
| Gorham's Cave | 28360 | 480 |  | Mousterian |
| Gorham's Cave | 27020 | 480 |  | Mousterian |
| Gorham's Cave | 29910 | 600 |  | Mousterian |
| Gorham's Cave | 31480 | 740 |  | Mousterian |
| Gorham's Cave | 30310 | 620 |  | Mousterian |
| Gorham's Cave | 23780 | 540 |  | Aurignacian |
| Gorham's Cave | 24010 | 320 |  | Aurignacian |
| Gorham's Cave | 26400 | 440 |  | Aurignacian |
| Gorham's Cave | 28570 | 480 |  | Mousterian |
| Gorham's Cave | 29400 | 540 |  | Mousterian |
| Gorham's Cave | 30560 | 720 |  | Mousterian |
| Gorham's Cave | 31110 | 460 |  | Mousterian |
| Gorham's Cave | 29720 | 560 |  | Mousterian |
| Gorham's Cave | 23360 | 320 |  | Mousterian |
| Gorham's Cave | 31290 | 680 |  | Mousterian |
| Gorham's Cave | 31780 | 720 |  | Mousterian |
| Gorham's Cave | 32100 | 800 |  | Mousterian |
| Gorham's Cave | 31850 | 760 |  | Mousterian |
| Gorham's Cave | 28210 | 480 |  | Mousterian |
| Gorham's Cave | 29210 | 380 |  | Mousterian |
| Gorham's Cave | 32560 | 780 |  | Mousterian |

Sites with Geographic Coordinates.

| **Site** | **Latitude** | **Longitude** |
| --- | --- | --- |
| Gatzarria | 43.09173672220 | -1.31516333186 |
| Isturitz | 43.28447306370 | -1.49362290730 |
| Amalda | 43.20119192850 | -1.93620265438 |
| Ekain | 43.16312055240 | -2.09800600278 |
| Axlor | 43.22736599950 | -2.32167533733 |
| Labeko Koba | 43.14646432530 | -2.47871976371 |
| El Miron | 43.10006483570 | -2.74640912687 |
| Arrilor | 43.35704662440 | -2.97483738343 |
| Covalejos | 43.27614495020 | -3.99800561593 |
| Morin | 43.37608231240 | -3.92662178576 |
| Llonin | 43.32373417030 | -4.73087960573 |
| LaVina | 43.41891261050 | -5.83494951243 |
| Esquilleu | 43.39035907840 | -5.24484318299 |
| El Sidron | 43.20476112000 | -4.68329038561 |
| Valina | 43.34752878030 | -7.40301431528 |
| Cardina-Saltodo Boi | 41.05372837070 | -7.14127360464 |
| Lagar Velho | 39.98772984010 | -8.78310169866 |
| Foz do Enxarrique | 39.48804302890 | -7.85511190638 |
| Gruta da Oliveira | 39.67839990930 | -8.66412864837 |
| Mira Nascente | 39.61177500120 | -9.02104779924 |
| Pego do Diabo | 38.77420472710 | -9.26375282184 |
| Gorhans Cave | 36.18535115280 | -5.34240108423 |
| Bajondillo | 36.49944000560 | -4.70946445668 |
| Zafarraya | 36.74690395020 | -4.30495608569 |
| Sima de Las Palomas | 37.65585805440 | -0.89280900333 |
| La Boja | 37.80814355880 | -1.39249581455 |
| Anton | 37.88904523300 | -1.36870120449 |
| Cova Beneito | 38.56481215860 | -0.29794375187 |
| Foradada | 38.75516903910 | 0.14463599522 |
| Les Cendres | 38.99549460070 | -0.21704207767 |
| Les Mallaetes | 39.06211950880 | -0.19800638962 |
| Cova Gran | 41.82229427560 | 0.82040292087 |
| Abric Romani | 41.35116099640 | 1.91971390557 |
| Arbreda | 41.96506193600 | 3.02378381227 |

3. data(DatesMUP)

# Summed Probability Distribution for Neanderthals in Iberia

NEA=subset(DatesMUP,Homo=="NEA") #subset of Neanderthal dates

NEA.caldates=calibrate(x=NEA$Age,errors=NEA$SD,calCurves='intcal20')

NEA.spd = spd(NEA.caldates,timeRange=c(50000,20000))

plot(NEA.spd)

plot(NEA.spd,runm=200,add=TRUE,type="simple",col="darkorange",lwd=1.5,lty=2) #using a rolling average of 200 years for smoothing

NEA.bins = binPrep(sites=NEA$Site,ages=NEA$Age,h=100)

NEA.spd.bins = spd(NEA.caldates,bins=NEA.bins,timeRange=c(50000,20000))

plot(NEA.spd.bins)

NEA.randates = sampleDates(NEA.caldates,bins=NEA.bins,nsim=100,verbose=FALSE)

D.ckde = ckde(NEA.randates,timeRange=c(50000,20000),bw=200)

plot(D.ckde,type='multiline')

nsim = 100

expnull <- modelTest(NEA.caldates, errors=NEA$SD, bins=NEA.bins, nsim=nsim, timeRange=c(50000,20000), model="exponential",runm=100)

plot(expnull)

expnull$pval #global p-value

summary(expnull)

# Summed Probability Distribution for AMH in Iberia

AMH=subset(DatesMUP,Homo=="AMH") #subset of AMH dates

AMH.caldates=calibrate(x=AMH$Age,errors=AMH$SD,calCurves='intcal20')

AMH.spd = spd(AMH.caldates,timeRange=c(50000,20000))

plot(AMH.spd)

plot(AMH.spd,runm=200,add=TRUE,type="simple",col="darkorange",lwd=1.5,lty=2)

AMH.bins = binPrep(sites=AMH$Site,ages=AMH$Age,h=100)

AMH.spd.bins = spd(AMH.caldates,bins=AMH.bins,timeRange=c(50000,20000))

plot(AMH.spd.bins)

AMH.randates = sampleDates(AMH.caldates,bins=AMH.bins,nsim=100,verbose=FALSE)

D.ckde = ckde(AMH.randates,timeRange=c(50000,20000),bw=200)

plot(D.ckde,type='multiline')

nsim = 100

expnull <- modelTest(AMH.caldates, errors=AMH$SD, bins=AMH.bins, nsim=nsim, timeRange=c(50000,20000), model="exponential",runm=100)

plot(expnull)

expnull$pval

summary(expnull)
